# Supplementary material for: Exploratory Study on Application of MALDI-TOF-MS to Detect SARS-CoV-2 Infection in Human Saliva
Source: MDPI journal article supplement (doi:10.3390/jcm11020295), 2022-01-06
Supplement: s1 [file s1]

## Supplementary Materials

**Table S1.** List of peaks distinguishing SARS-CoV-2 positive from negative samples after the application of Wilcoxon rank sum test ( $p < 0.05$ ).

| Peaks (m/z) | p-value | **Ratio |
|-------------|---------|---------|
| 2047.9      | 7.9e-04 | 31.1    |
| *2102.4     | 1.9e-04 | -41.4   |
| 2166.6      | 4.5e-02 | 16.0    |
| 2202.9      | 1.5e-03 | -34.1   |
| *2489.2     | 2.1e-07 | 81.3    |
| 2520.3      | 1.8e-02 | 14.9    |
| 2580.6      | 1.7e-02 | 14.0    |
| 2597        | 3.9e-02 | -33.3   |
| 2687.7      | 4.7e-02 | -27.7   |
| 2938.5      | 2.7e-03 | 52.7    |
| *2977.2     | 9.1e-05 | 53.9    |
| 3203.5      | 4.8e-02 | 32.1    |
| 3220.3      | 1.0e-02 | 24.2    |
| 3494.4      | 5.6e-03 | 17.0    |
| *3522.3     | 2.5e-05 | 60.1    |
| 3980.6      | 1.3e-03 | 35.6    |
| 4033.5      | 1.2e-03 | 80.9    |
| 4062.2      | 2.7e-02 | 50.8    |
| 4129.9      | 1.4e-02 | -35.1   |
| 4191        | 3.2e-02 | 33.0    |
| 4394.1      | 8.1e-03 | 30.5    |
| 4449.2      | 3.5e-03 | -45.1   |
| 4612.1      | 1.5e-02 | 30.4    |
| 4658.9      | 2.5e-02 | 16.9    |
| 4964.9      | 3.1e-02 | 41.9    |
| 5034.6      | 3.8e-03 | 92.7    |
| *5063.3     | 3.2e-05 | 40.9    |
| 5099.3      | 3.7e-02 | 17.9    |
| 5134.5      | 2.5e-02 | 20.4    |
| 5153.9      | 1.1e-03 | 22.2    |
| 5233.9      | 9.9e-03 | 57.2    |
| 5380.4      | 1.3e-03 | -38.3   |
| *5418.9     | 1.4e-05 | -58.5   |
| *5463.3     | 3.3e-04 | 23.4    |
| 5503        | 4.9e-02 | 16.1    |
| *5613.4     | 8.7e-05 | 37.7    |
| 5652.5      | 3.8e-03 | 8.8     |
| 5734.4      | 1.2e-02 | 22.3    |
| *5814       | 3.0e-04 | 28.0    |
| 5867.2      | 1.3e-03 | 39.0    |
| 6305.7      | 1.3e-02 | 18.6    |
| 7376        | 1.4e-02 | 44.1    |
| 7647.3      | 4.5e-02 | -37.9   |
| 7684.5      | 2.9e-03 | -42.1   |
| 7853.8      | 3.0e-02 | 28.2    |
| 8145.2      | 5.9e-04 | 28.2    |
| 8300.7      | 1.3e-02 | 31.3    |
| 8741.5      | 3.1e-02 | -30.1   |
| 9059.1      | 2.7e-02 | 35.4    |
| 9798.3      | 8.0e-03 | 60.3    |
| 9959.3      | 7.7e-03 | -30.9   |
| 11004.3     | 2.7e-02 | 24.1    |

\*Peaks identified with a two-tailed Wilcoxon rank sum test ( $p < 0.05$ ) with a Benjamini-Hochberg correction ( $p < 0.1$ ).

\*\*Ratio computed from normalised mean intensities peaks between Cov- and Cov+ groups for the D0 time point.

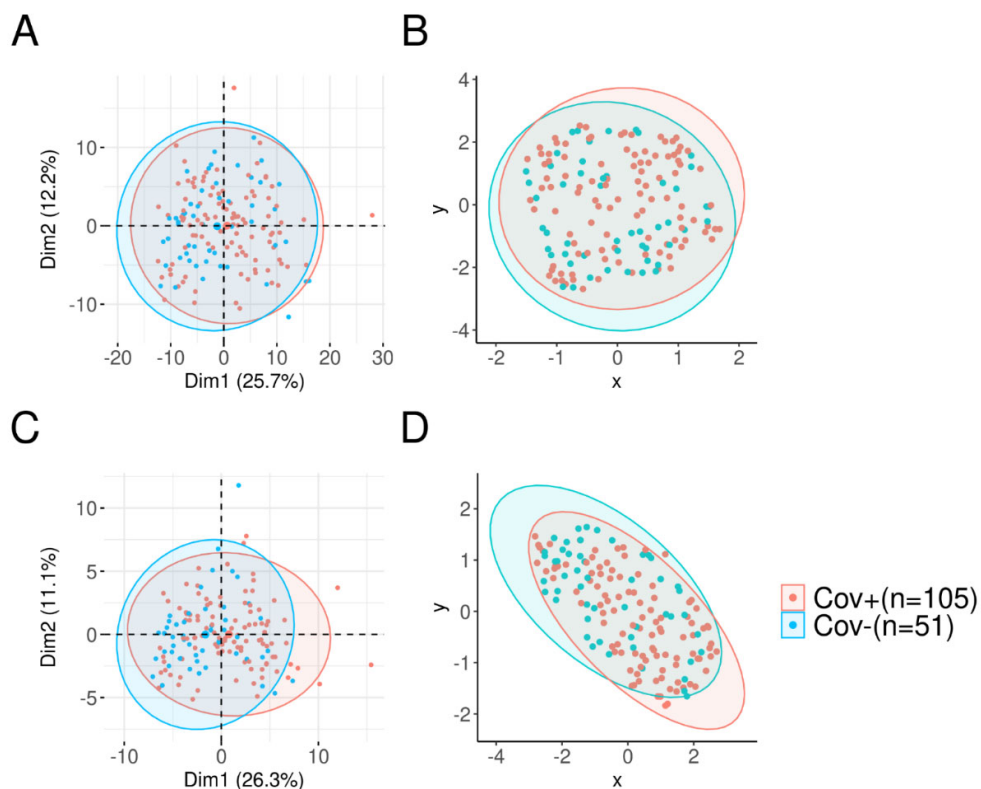

**Figure S1.** Reduction of dimension analysis performed from several sets of peaks for SARS-CoV-2(+) (n=105) and control (n=51). PCA (A) and UMAP (B) performed on all detected peaks. Ellipses define the boundary areas for the categorical variables projections PCA (C) and UMAP (D) performed on the 52 peaks selected with two-tailed Wilcoxon rank sum test ( $p < 0.05$ ). PCA: Principal Component Analysis; UMAP: Uniform Manifold Approximation and Projection.
